# Supplementary material for: Spiroleiferthione A and Oleiferthione A: Two Unusual Isothiocyanate-Derived Thioketone Alkaloids from Moringa oleifera Lam. Seeds
Source: MDPI journal article supplement (doi:10.3390/ph16030452), 2023-03-16
Supplement: s1 [file s1]

**Spiroleiferthione A and Oleiferthione A: Two Isothiocyanate-derived Thioketone Alkaloids from *Moringa oleifera* Lam. Seeds**

Yueping Jiang,<sup>a,b</sup> Rong Liu,<sup>a,b</sup> Lin Huang,<sup>c</sup> Qi Huang,<sup>a,b</sup> Min Liu,<sup>a,b</sup> Shao Liu,<sup>\*, a,b</sup> and Jing Li<sup>\*, a,b</sup>

<sup>a</sup> Department of Pharmacy, Xiangya Hospital, Central South University, Changsha, 410008, China

<sup>b</sup> Institute for Rational and Safe Medication Practices, National Clinical Research Center for Geriatric Disorders, Xiangya Hospital, Central South University, Changsha, 410008, China

<sup>c</sup> College of Pharmacy, Dali University, Dali, 671000, China

**Corresponding Author**

\*E-mail: liushao999@csu.edu.cn (S. Liu)

\*E-mail: lijingliyun@163.com (J. Li)

**Supporting Information**

## Table of Contents

| No. | Contents                                                                                                                                                                            | Page |
|-----|-------------------------------------------------------------------------------------------------------------------------------------------------------------------------------------|------|
| 1   | <b>Figure S1.</b> The linear correlation plots of predicted versus experimental $^{13}\text{C}$ NMR chemical shifts. (Left (5R, 7R, 8S)- <b>1</b> , Right (5S, 7R, 8S)- <b>1</b> ). | S3   |
| 2   | <b>Figure S2.</b> (+)-HRESIMS spectrum of compound <b>1</b> (page 1).                                                                                                               | S4   |
| 3   | <b>Figure S3.</b> (+)-HRESIMS spectrum of compound <b>1</b> (page 2).                                                                                                               | S5   |
| 4   | <b>Figure S4.</b> The UV spectrum of compound <b>1</b> in MeOH.                                                                                                                     | S6   |
| 5   | <b>Figure S5.</b> The IR spectrum of compound <b>1</b> .                                                                                                                            | S6   |
| 6   | <b>Figure S6.</b> The $^1\text{H}$ NMR spectrum of compound <b>1</b> in MeOH- $d_4$ (500 MHz).                                                                                      | S7   |
| 7   | <b>Figure S7.</b> The $^{13}\text{C}$ NMR spectrum of compound <b>1</b> in MeOH- $d_4$ (125 MHz).                                                                                   | S7   |
| 8   | <b>Figure S8.</b> The $^1\text{H}$ - $^1\text{H}$ COSY spectrum of compound <b>1</b> in MeOH- $d_4$ (500 MHz).                                                                      | S8   |
| 9   | <b>Figure S9.</b> The HSQC spectrum of compound <b>1</b> in MeOH- $d_4$ (500 MHz for $^1\text{H}$ ).                                                                                | S8   |
| 10  | <b>Figure S10.</b> The HMBC spectrum of compound <b>1</b> in MeOH- $d_4$ (500 MHz for $^1\text{H}$ ).                                                                               | S9   |
| 11  | <b>Figure S11.</b> The ROESY spectrum and enlarged ROESY spectrum of compound <b>1</b> in MeOH- $d_4$ (500 MHz).                                                                    | S9   |
| 12  | <b>Figure S12.</b> The $^1\text{H}$ NMR spectrum of compound <b>1</b> in DMSO- $d_6$ (600 MHz).                                                                                     | S10  |
| 13  | <b>Figure S13.</b> The $^{13}\text{C}$ NMR spectrum of compound <b>1</b> in DMSO- $d_6$ (150 MHz).                                                                                  | S10  |
| 14  | <b>Figure S14.</b> The DEPT spectrum of compound <b>1</b> in DMSO- $d_6$ (150 MHz).                                                                                                 | S11  |
| 15  | <b>Figure S15.</b> The $^1\text{H}$ - $^1\text{H}$ COSY spectrum of compound <b>1</b> in DMSO- $d_6$ (600 MHz).                                                                     | S11  |
| 16  | <b>Figure S16.</b> The HSQC spectrum of compound <b>1</b> in DMSO- $d_6$ (600 MHz for $^1\text{H}$ ).                                                                               | S12  |
| 17  | <b>Figure S17.</b> The HMBC spectrum of compound <b>1</b> in DMSO- $d_6$ (600 MHz for $^1\text{H}$ ).                                                                               | S12  |
| 18  | <b>Figure S18.</b> The NOESY spectrum and enlarged NOESY spectrum of compound <b>1</b> in DMSO- $d_6$ (600 MHz).                                                                    | S13  |
| 19  | <b>Figure S19.</b> (+)-HRESIMS spectrum of compound <b>2</b> (page 1).                                                                                                              | S14  |
| 20  | <b>Figure S20.</b> (+)-HRESIMS spectrum of compound <b>2</b> (page 2).                                                                                                              | S15  |
| 21  | <b>Figure S21.</b> The UV spectrum of compound <b>2</b> in MeOH.                                                                                                                    | S16  |
| 22  | <b>Figure S22.</b> The IR spectrum of compound <b>2</b> .                                                                                                                           | S16  |
| 23  | <b>Figure S23.</b> The $^1\text{H}$ NMR spectrum of compound <b>2</b> in MeOH- $d_4$ (500 MHz).                                                                                     | S17  |

|    |                                                                                                                   |     |
|----|-------------------------------------------------------------------------------------------------------------------|-----|
| 24 | <b>Figure S24.</b> The $^{13}\text{C}$ NMR spectrum of compound <b>2</b> in $\text{MeOH-}d_4$ (125 MHz).          | S17 |
| 25 | <b>Figure S25.</b> The DEPT spectrum of compound <b>2</b> in $\text{MeOH-}d_4$ (125 MHz).                         | S18 |
| 26 | <b>Figure S26.</b> The $^1\text{H-}^1\text{H}$ COSY spectrum of compound <b>2</b> in $\text{MeOH-}d_4$ (500 MHz). | S18 |
| 27 | <b>Figure S27.</b> The HSQC spectrum of compound <b>2</b> in $\text{MeOH-}d_4$ (500 MHz for $^1\text{H}$ ).       | S19 |
| 28 | <b>Figure S28.</b> The HMBC spectrum of compound <b>2</b> in $\text{MeOH-}d_4$ (500 MHz for $^1\text{H}$ ).       | S19 |
| 29 | <b>Table S1.</b> Geometry data of conformers of isomer <b>1a</b> and isomer <b>1b</b> .                           | S20 |

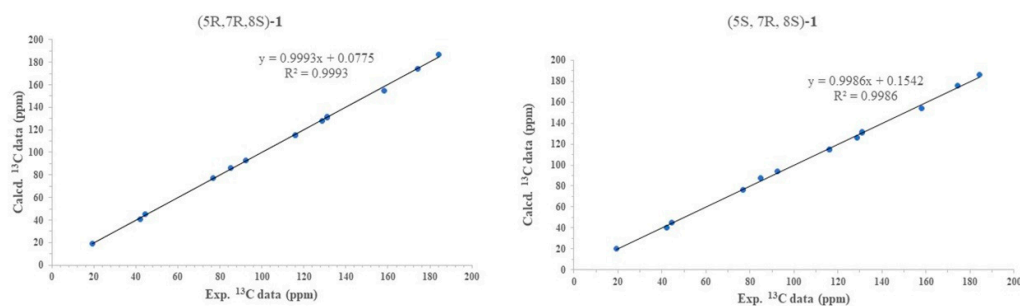

**Figure S1.** The linear correlation plots of predicted versus experimental  $^{13}\text{C}$  NMR chemical shifts.  
(Left (5R, 7R, 8S)-1, Right (5S, 7R, 8S)-1).

## Qualitative Analysis Report

### Chromatograms

Fragmentor Voltage 110 Collision Energy 0 Ionization Mode ESI

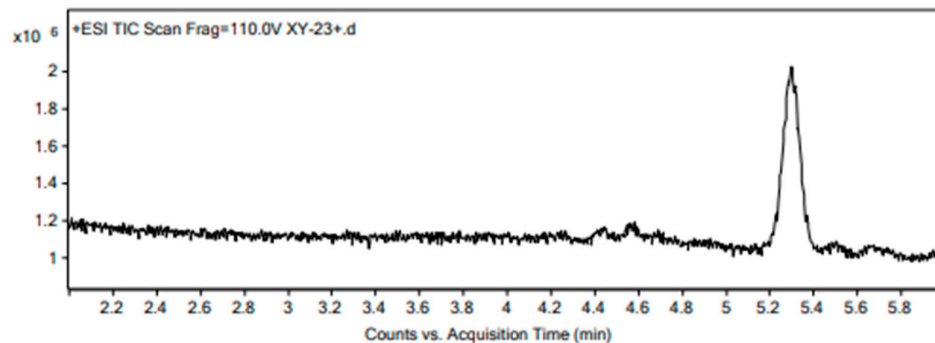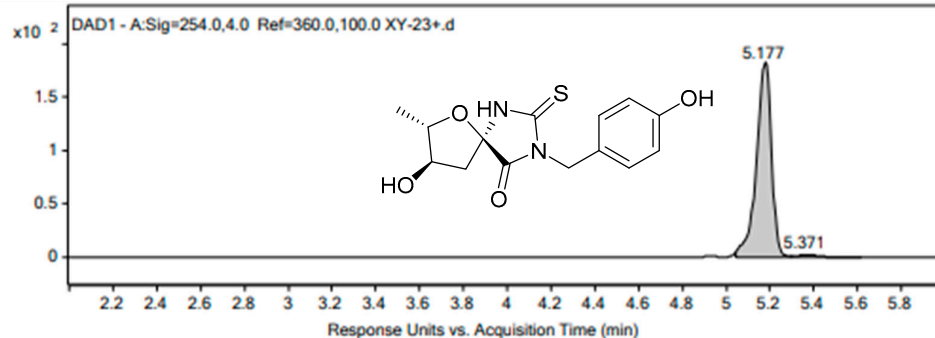

### Spectra

Fragmentor Voltage 110 Collision Energy 0 Ionization Mode ESI

Figure S2. (+)-HRESIMS spectrum of compound 1 (page 1).

# Qualitative Analysis Report

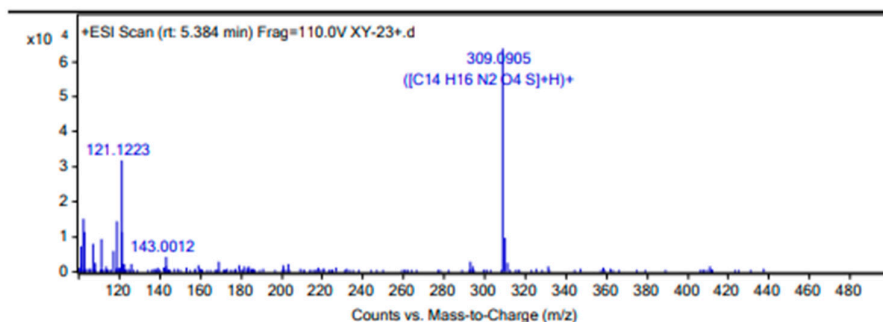

| Formula Calculator Element Limits |     |     |
|-----------------------------------|-----|-----|
| Element                           | Min | Max |
| C                                 | 0   | 60  |
| H                                 | 0   | 120 |
| O                                 | 0   | 10  |
| N                                 | 0   | 5   |
| S                                 | 0   | 5   |

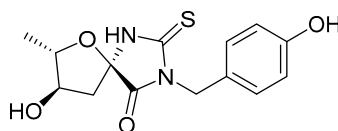

| Formula Calculator Results |       |          |          |            |                 |       |
|----------------------------|-------|----------|----------|------------|-----------------|-------|
| Formula                    | Best  | Mass     | Tgt Mass | Diff (ppm) | Ion Species     | Score |
| C14 H16 N2 O4 S            | True  | 308.0832 | 308.0831 | -0.28      | C14 H17 N2 O4 S | 97.22 |
| C12 H14 N5 O3 S            | False | 308.0832 | 308.0817 | -4.89      | C12 H15 N5 O3 S | 91.05 |
| C8 H14 N5 O8               | False | 308.0831 | 308.0842 | 3.85       | C8 H15 N5 O8    | 87.07 |
| C20 H10 N3 O               | False | 308.0829 | 308.0824 | -1.69      | C20 H11 N3 O    | 82.1  |
| C6 H20 N4 O6 S2            | False | 308.0834 | 308.0824 | -3.02      | C6 H21 N4 O6 S2 | 79.47 |
| C9 H18 N5 O3 S2            | False | 308.0833 | 308.0851 | 5.75       | C9 H19 N5 O3 S2 | 78.19 |
| C22 H12 O2                 | False | 308.0829 | 308.0837 | 2.84       | C22 H13 O2      | 77.78 |
| C11 H18 N O7 S             | False | 308.0832 | 308.0804 | -8.94      | C11 H19 N O7 S  | 76.14 |
| C17 H14 N3 O S             | False | 308.0832 | 308.0858 | 8.42       | C17 H15 N3 O S  | 75    |
| C10 H16 N2 O9              | False | 308.083  | 308.0856 | 8.53       | C10 H17 N2 O9   | 74.86 |

--- End Of Report ---

Figure S3. (+)-HRESIMS spectrum of compound **1** (page 2).

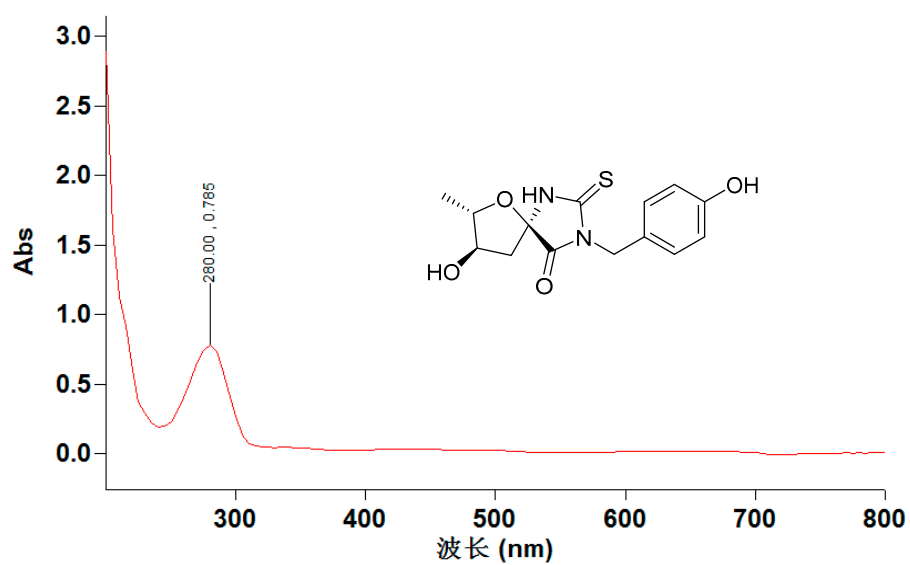

Figure S4. The UV spectrum of compound 1 in MeOH.

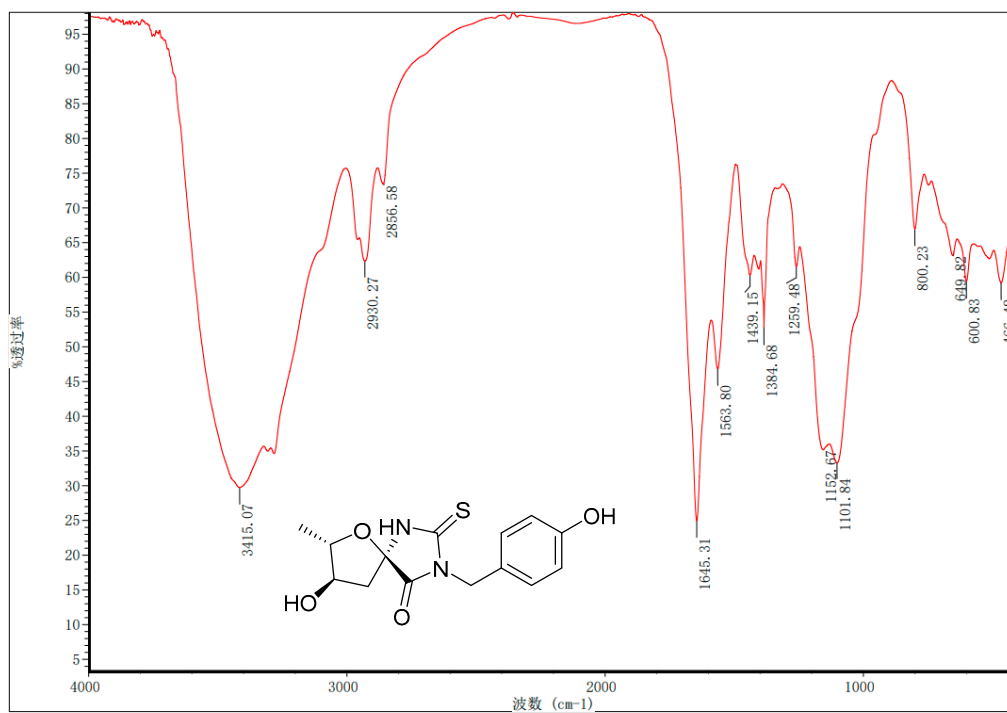

Figure S5. The IR spectrum of compound 1.

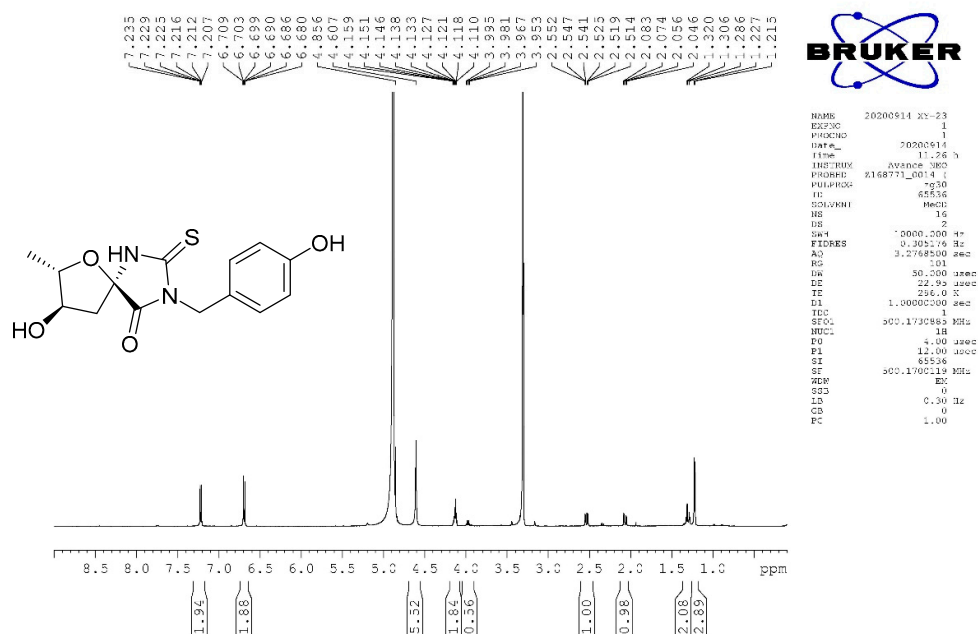

Figure S6. The <sup>1</sup>H NMR spectrum of compound **1** in MeOH-*d*<sub>4</sub> (500 MHz).

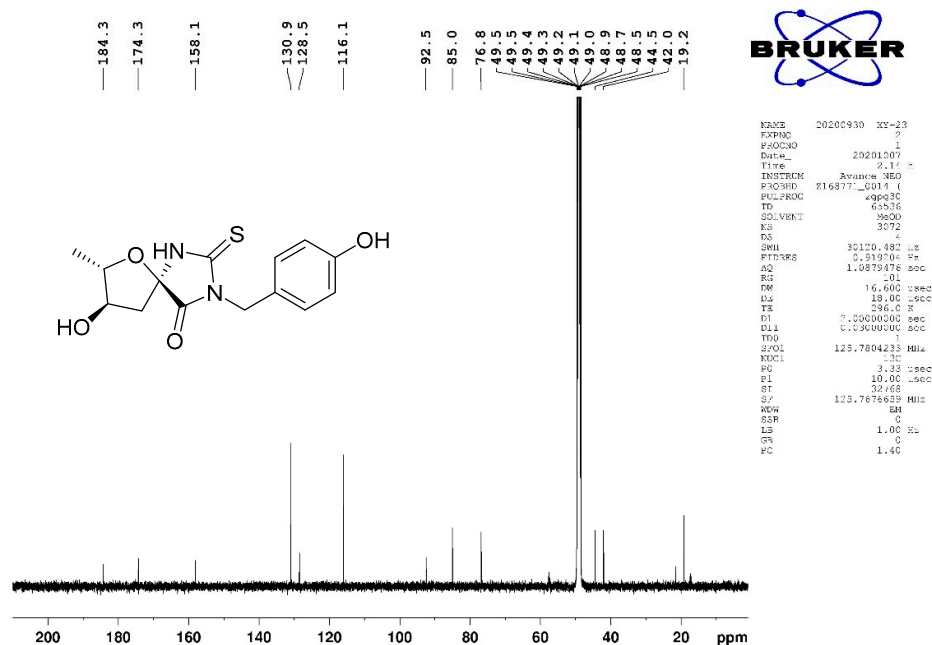

Figure S7. The <sup>13</sup>C NMR spectrum of compound **1** in MeOH-*d*<sub>4</sub> (125 MHz).

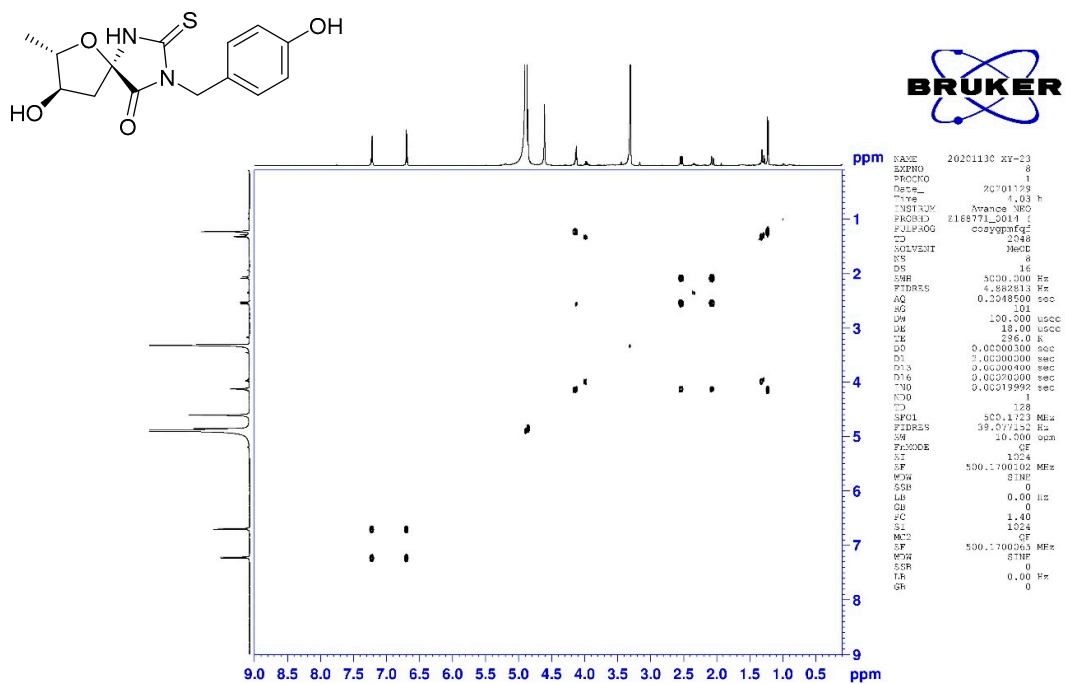

Figure S8. The  $^1\text{H}$ - $^1\text{H}$  COSY spectrum of compound 1 in  $\text{MeOH-}d_4$  (500 MHz).

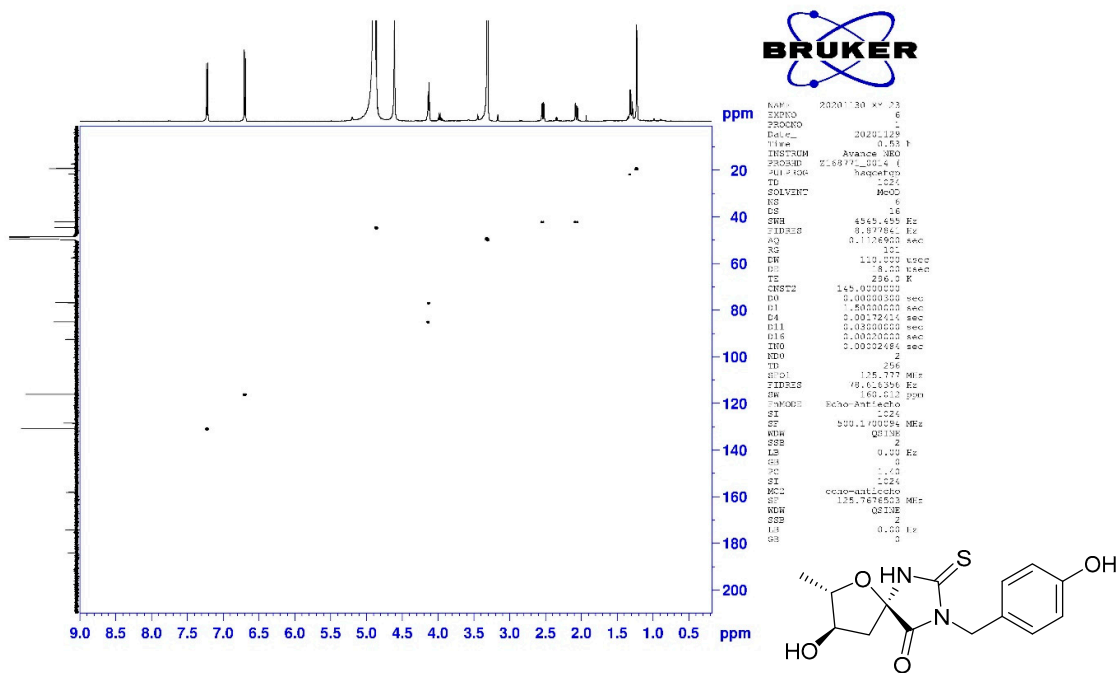

Figure S9. The HSQC spectrum of compound 1 in  $\text{MeOH-}d_4$  (500 MHz for  $^1\text{H}$ ).



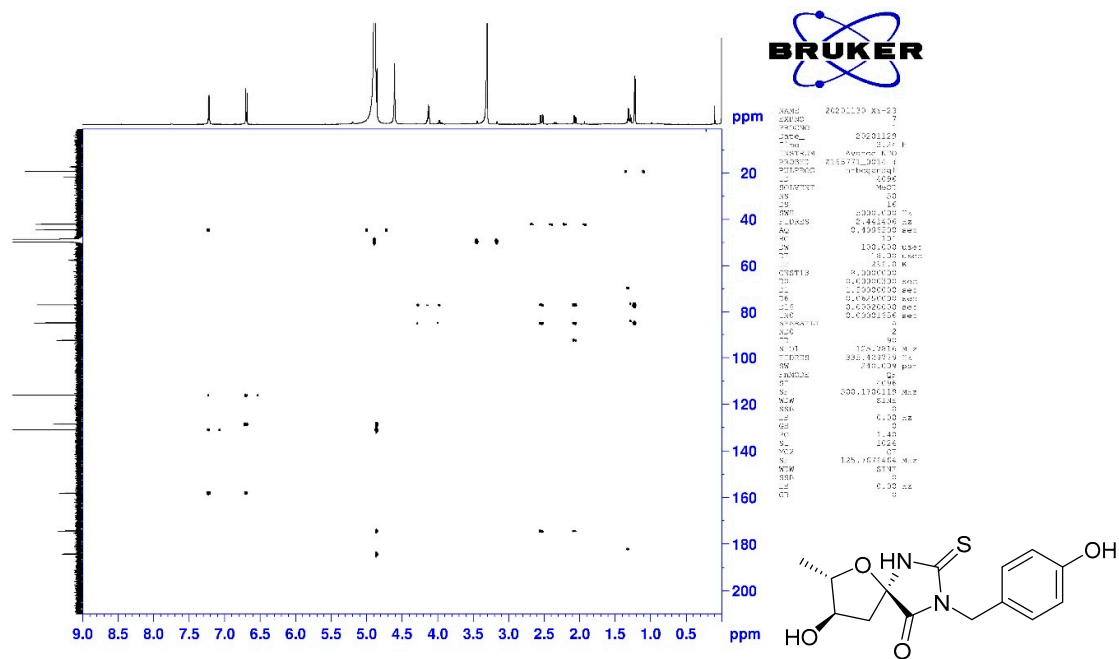

Figure S10. The HMBC spectrum of compound 1 in MeOH- $d_4$  (500 MHz for  $^1\text{H}$ ).

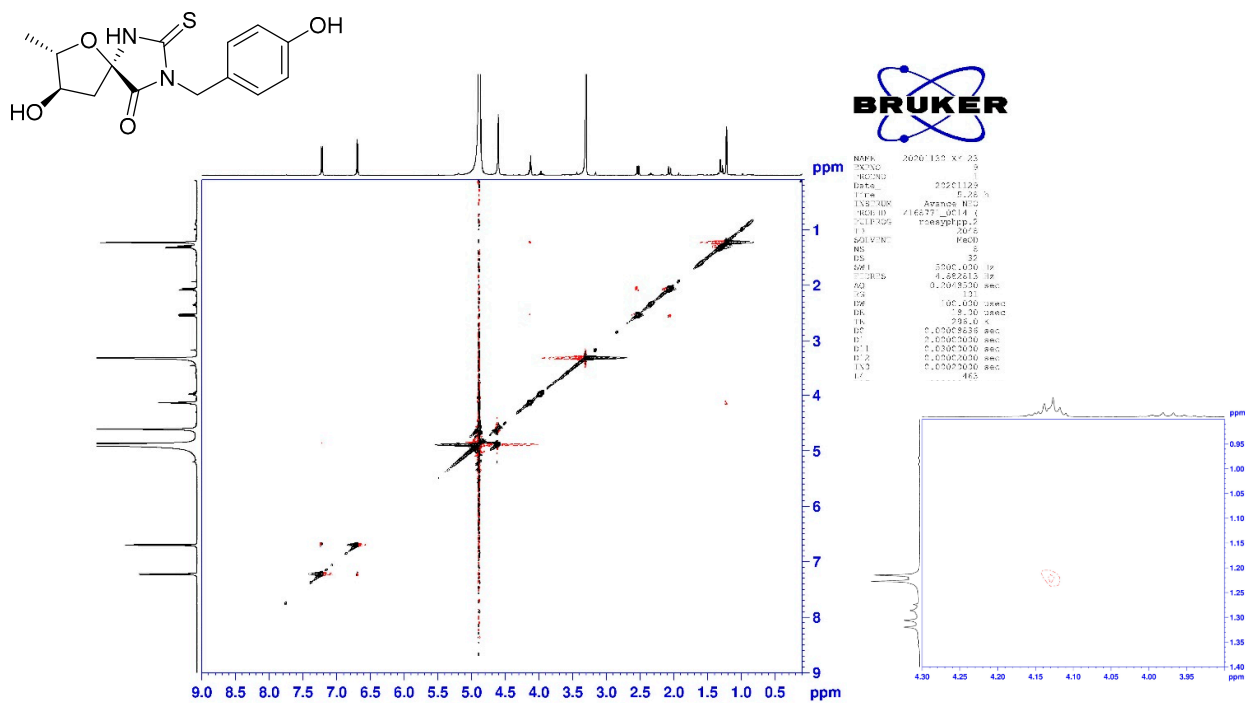

Figure S11. The ROESY spectrum and enlarged ROESY spectrum of compound 1 in MeOH- $d_4$  (500 MHz).

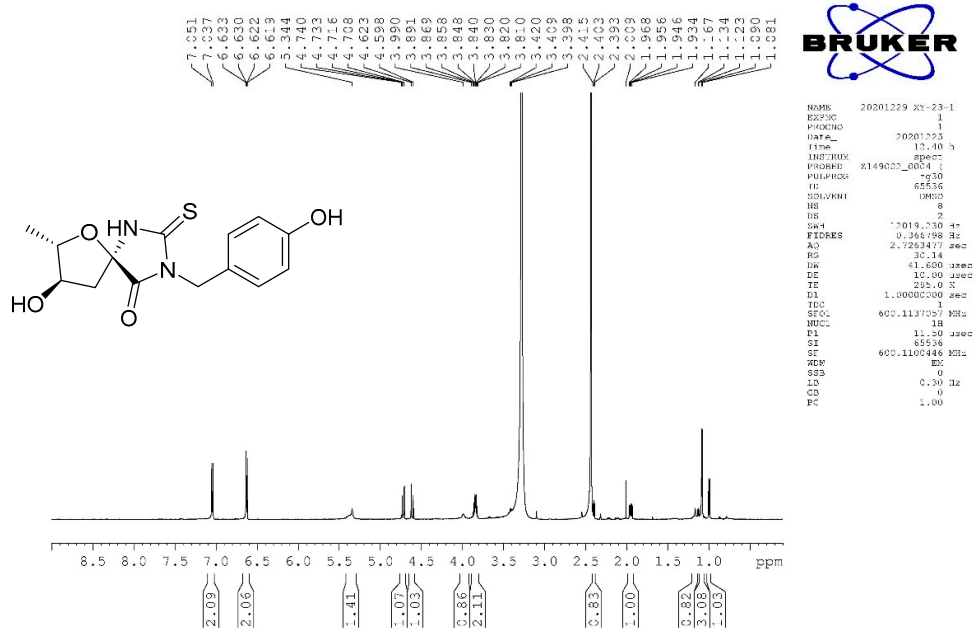

**Figure S12.** The <sup>1</sup>H NMR spectrum of compound **1** in DMSO-*d*<sub>6</sub> (600 MHz).

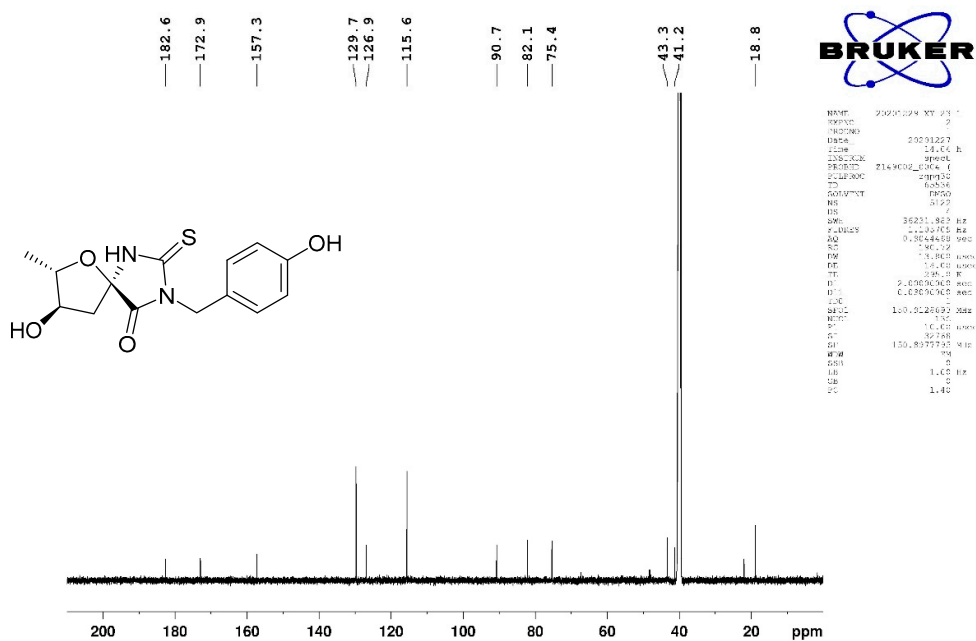

**Figure S13.** The <sup>13</sup>C NMR spectrum of compound **1** in DMSO-*d*<sub>6</sub> (150 MHz).

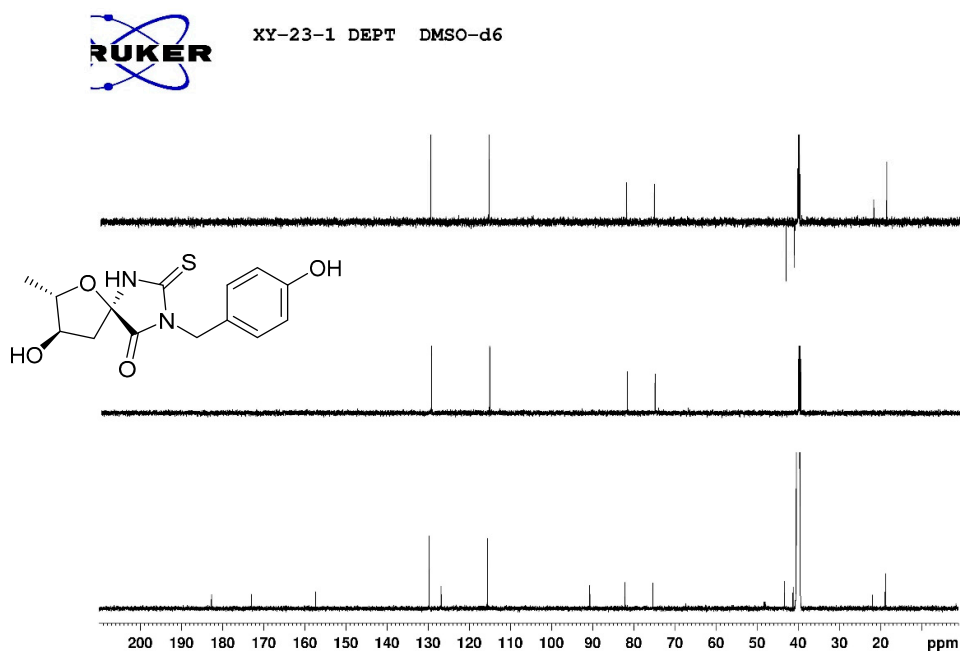

Figure S14. The DEPT spectrum of compound **1** in DMSO-*d*<sub>6</sub> (150 MHz).

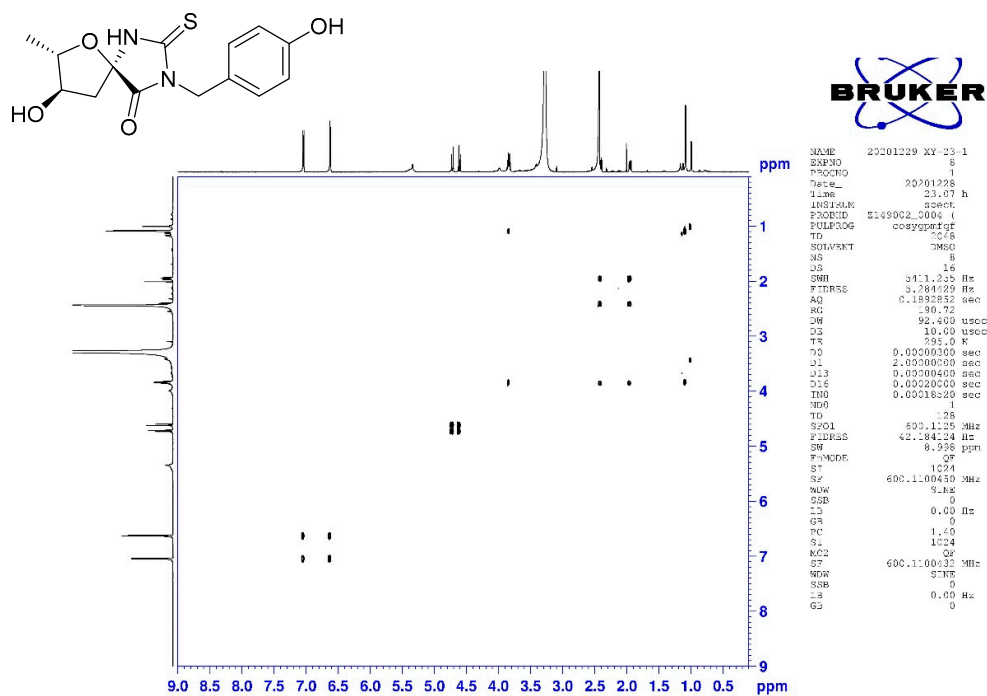

Figure S15. The <sup>1</sup>H-<sup>1</sup>H COSY spectrum of compound **1** in DMSO-*d*<sub>6</sub> (600 MHz).

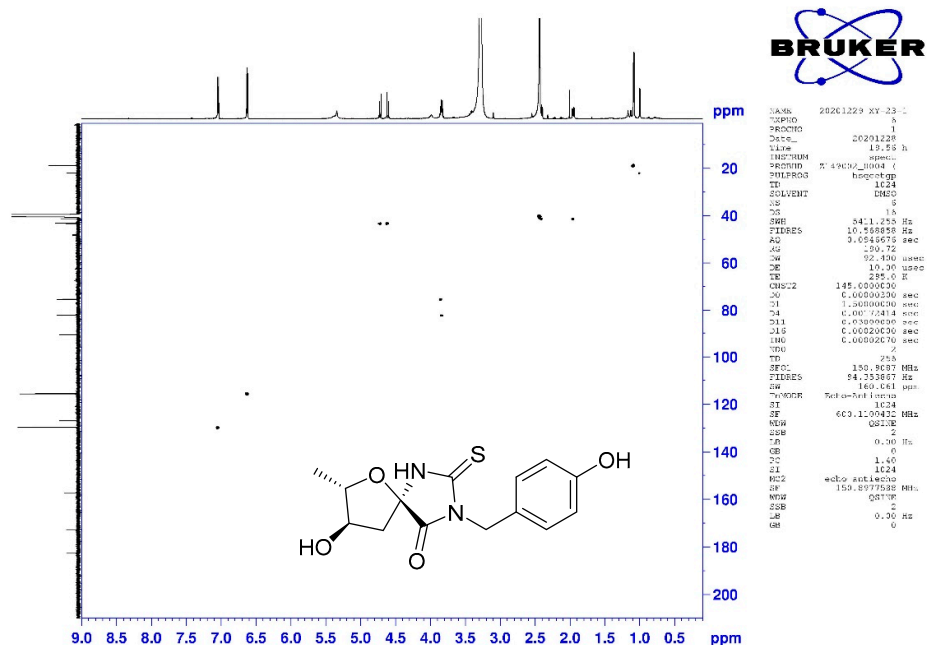

Figure S16. The HSQC spectrum of compound **1** in DMSO- $d_6$  (600 MHz for  $^1\text{H}$ ).

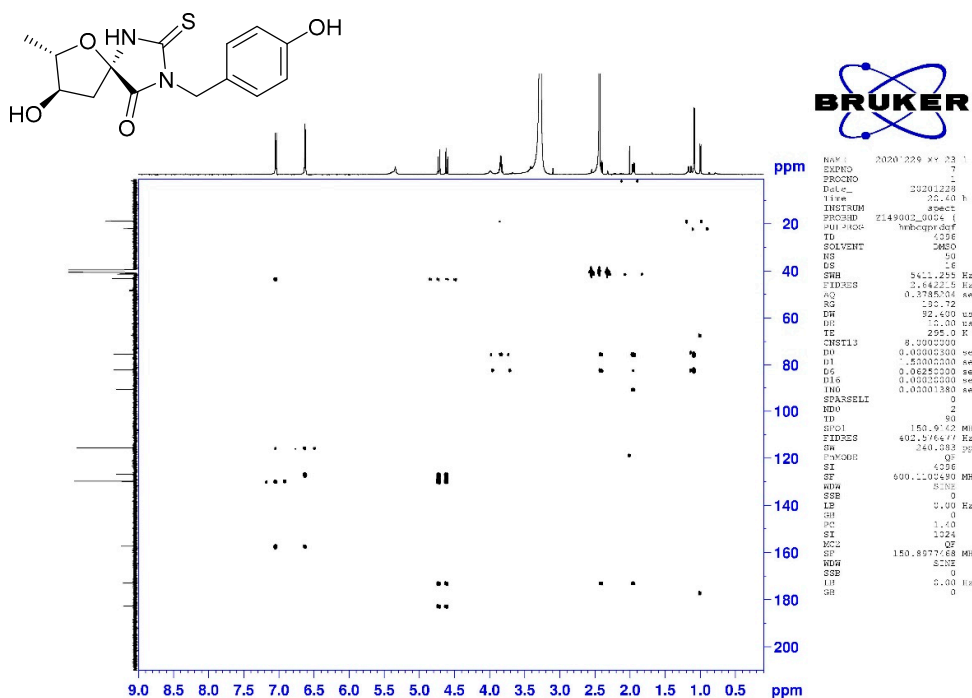

Figure S17. The HMBC spectrum of compound **1** in DMSO- $d_6$  (600 MHz for  $^1\text{H}$ ).

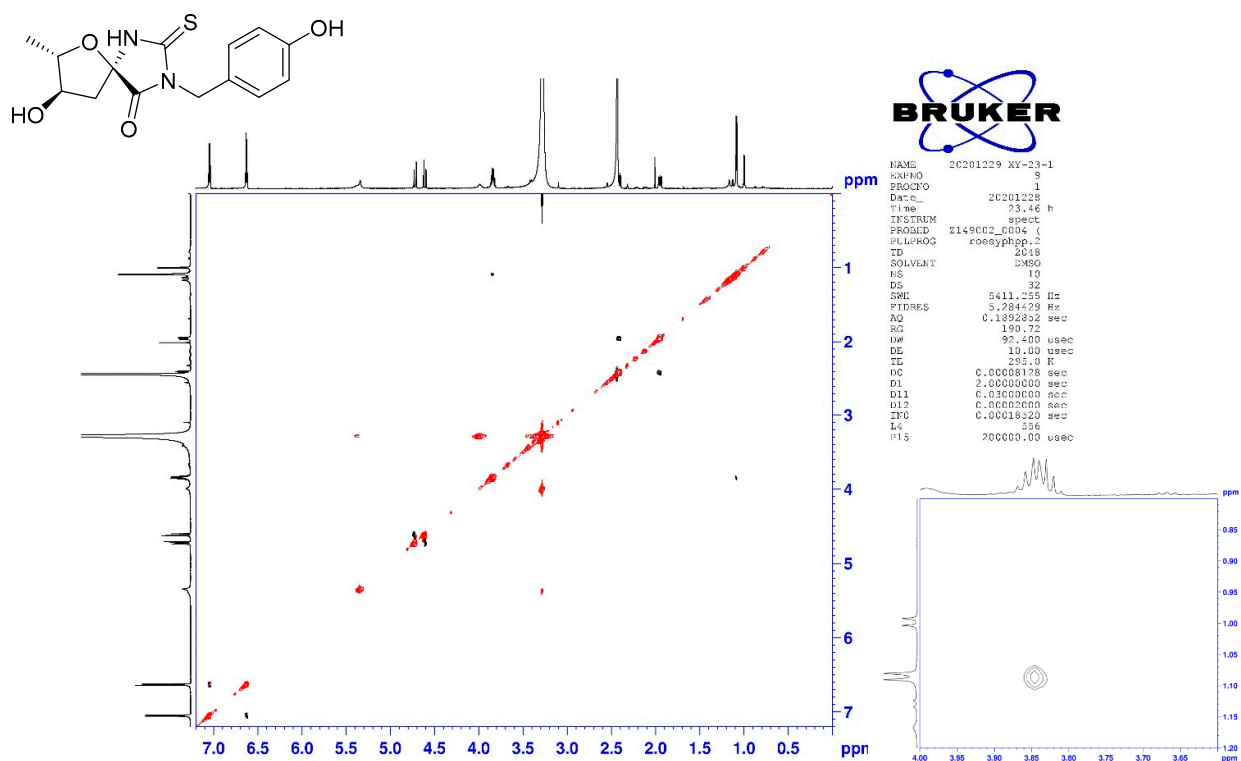

**Figure S18.** The NOESY spectrum and enlarged NOESY spectrum of compound **1** in DMSO- $d_6$  (600 MHz).

## Qualitative Analysis Report

### Chromatograms

Fragmentor Voltage 110 Collision Energy 0 Ionization Mode ESI

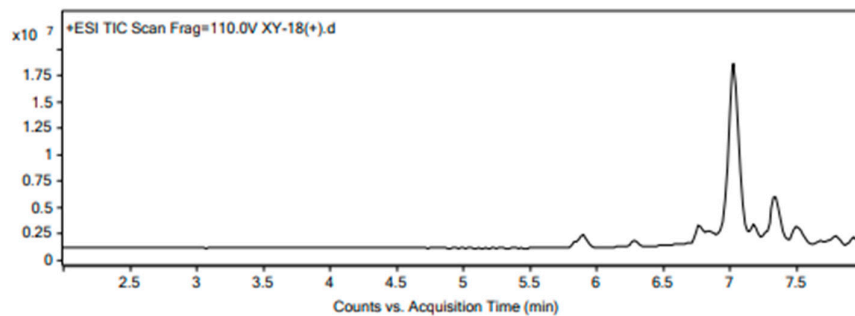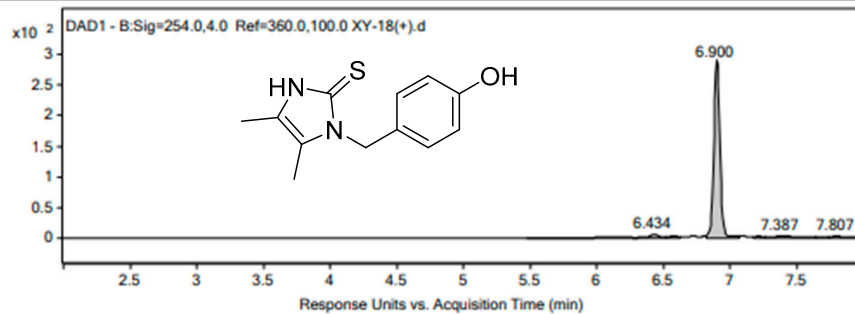

### Spectra

Fragmentor Voltage 110 Collision Energy 0 Ionization Mode ESI

Figure S19. (+)-HRESIMS spectrum of compound 2 (page 1).

# Qualitative Analysis Report

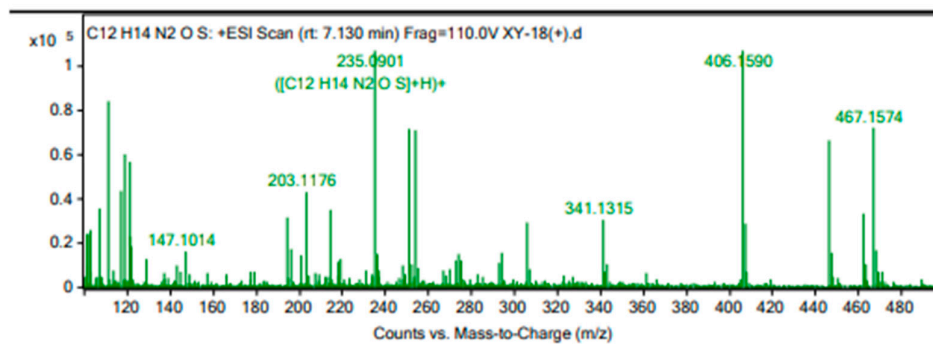

## Formula Calculator Element Limits

| Element | Min | Max |
|---------|-----|-----|
| C       | 0   | 60  |
| H       | 0   | 120 |
| O       | 0   | 10  |
| N       | 0   | 5   |
| S       | 0   | 5   |

## Formula Calculator Results

| Formula        | Best  | Mass     | Tgt Mass | Diff (ppm) | Ion Species    | Score |
|----------------|-------|----------|----------|------------|----------------|-------|
| C12 H14 N2 O S | True  | 234.083  | 234.0827 | -1.17      | C12 H15 N2 O S | 97.49 |
| C10 H12 N5 S   | False | 234.0831 | 234.0813 | -7.34      | C10 H13 N5 S   | 85.26 |
| C7 H16 N5 S2   | False | 234.0832 | 234.0847 | 6.58       | C7 H17 N5 S2   | 80.16 |
| C6 H12 N5 O5   | False | 234.0827 | 234.0838 | 4.92       | C6 H13 N5 O5   | 76.2  |
| C9 H16 N O4 S  | False | 234.0829 | 234.08   | -12.56     | C9 H17 N O4 S  | 70.08 |
| C9 H18 N2 O S2 | False | 234.0831 | 234.0861 | 12.76      | C9 H19 N2 O S2 | 65.82 |
| C8 H14 N2 O6   | False | 234.0826 | 234.0852 | 11.2       | C8 H15 N2 O6   | 61.79 |
| C10 H22 N O S2 | True  | 236.1143 | 236.1143 | 0.04       | C10 H23 N O S2 | 47.62 |
| C10 H14 N5 O2  | False | 236.1143 | 236.1147 | 2.03       | C10 H15 N5 O2  | 46.64 |
| C9 H18 N O6    | False | 236.1143 | 236.1134 | -3.64      | C9 H19 N O6    | 44.55 |
| C8 H20 N4 S2   | False | 236.1143 | 236.1129 | -5.65      | C8 H21 N4 S2   | 40.56 |
| C12 H16 N2 O3  | False | 236.1143 | 236.1161 | 7.71       | C12 H17 N2 O3  | 35.29 |

--- End Of Report ---

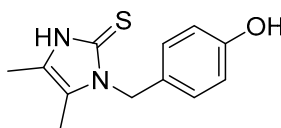

Figure S20. (+)-HRESIMS spectrum of compound 2 (page 2).

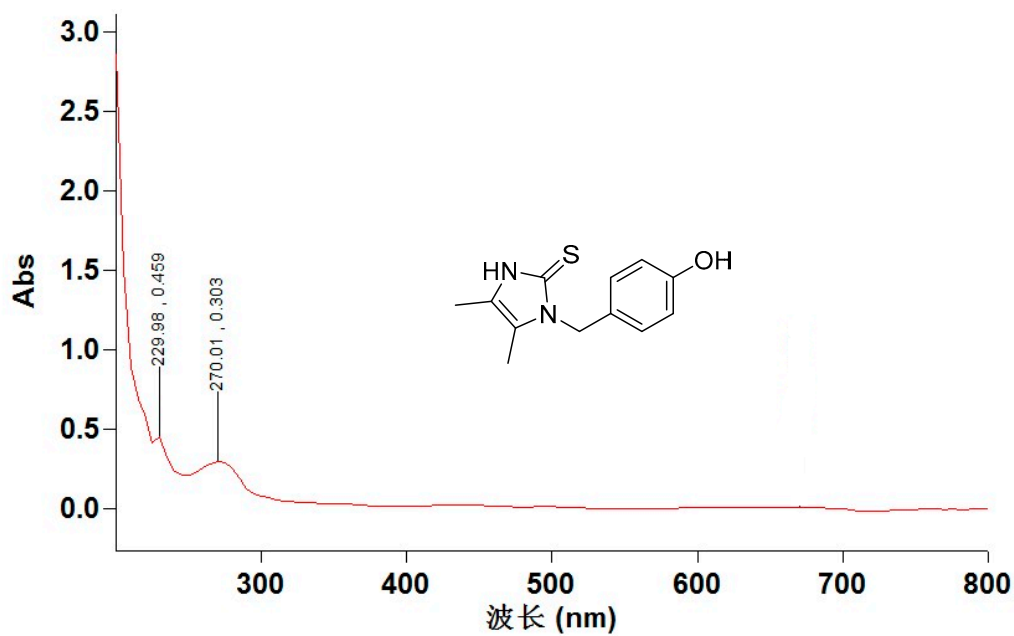

Figure S21. The UV spectrum of compound 2 in MeOH.

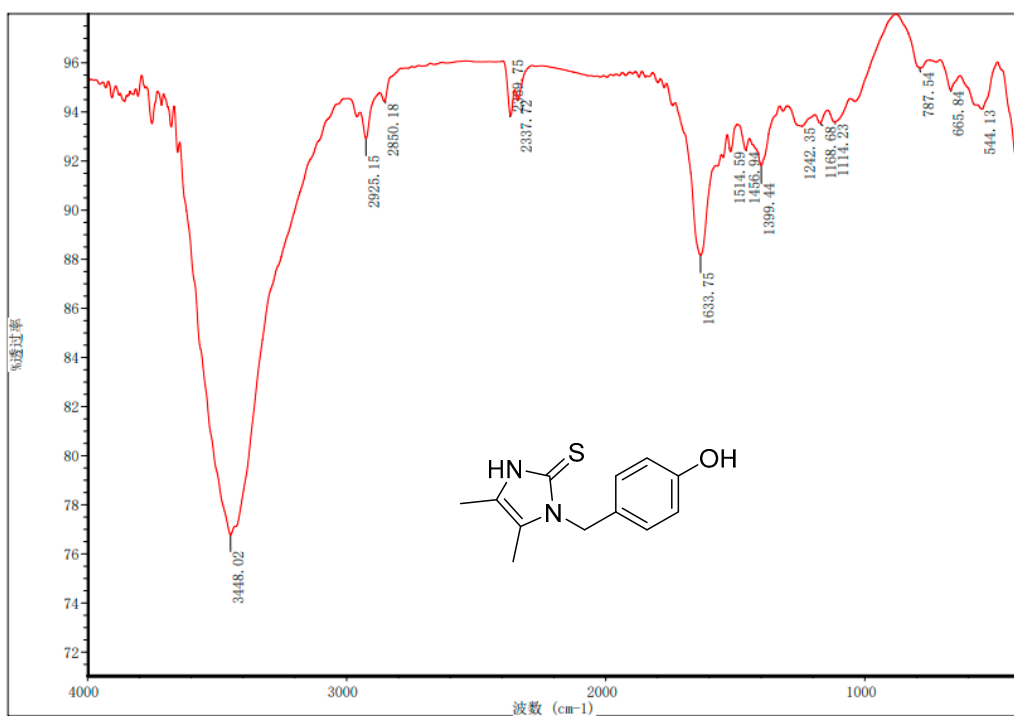

Figure S22. The IR spectrum of compound 2.



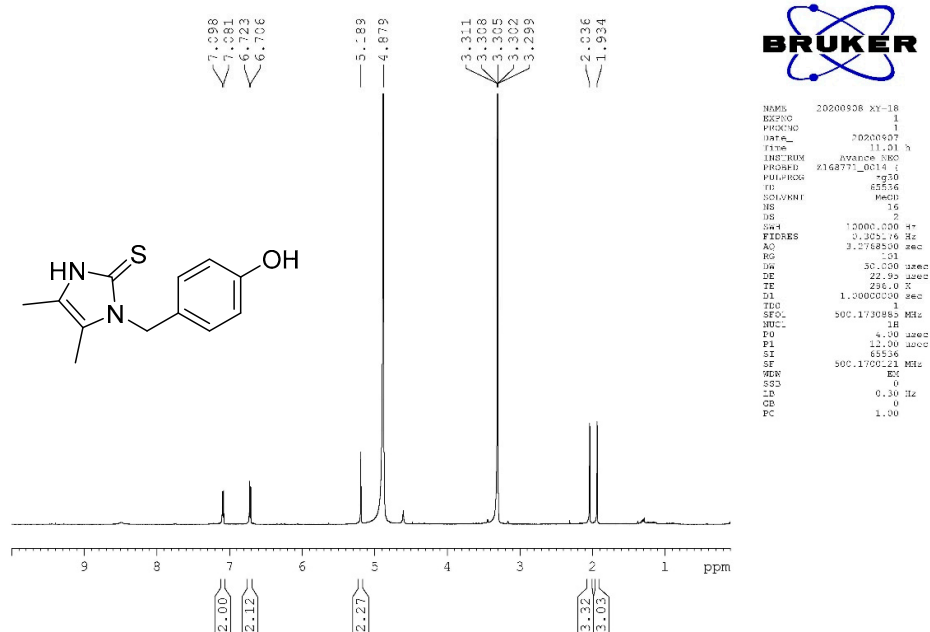

Figure S23. The <sup>1</sup>H NMR spectrum of compound 2 in MeOH-d<sub>4</sub> (500 MHz).

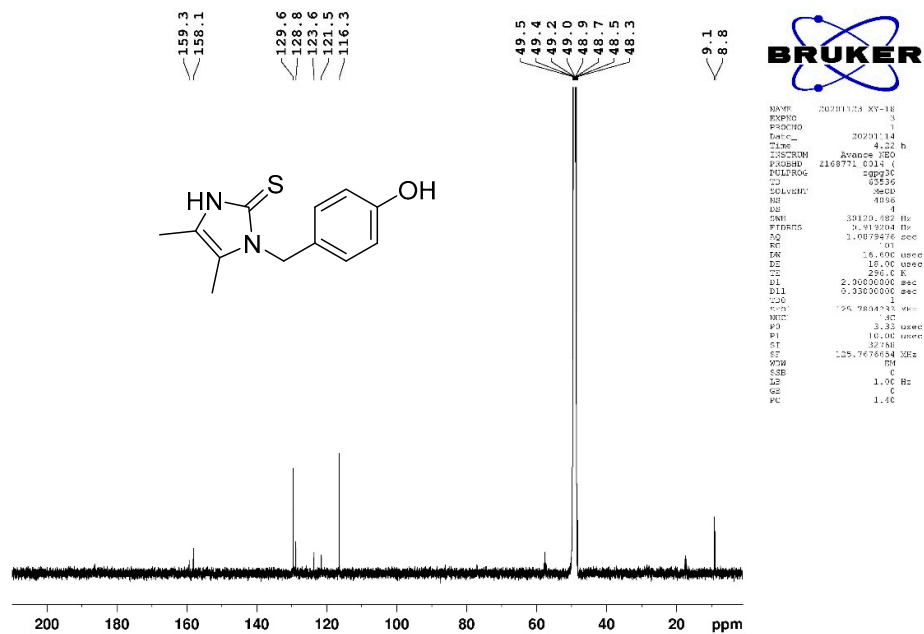

Figure S24. The <sup>13</sup>C NMR spectrum of compound 2 in MeOH-d<sub>4</sub> (125 MHz).

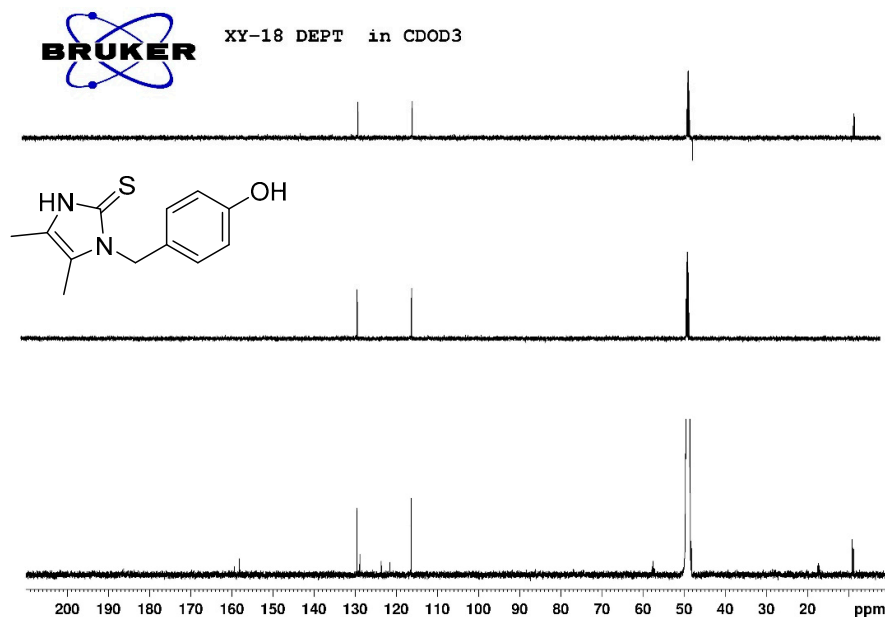

Figure S25. The DEPT spectrum of compound **2** in MeOH-*d*<sub>4</sub> (125 MHz).

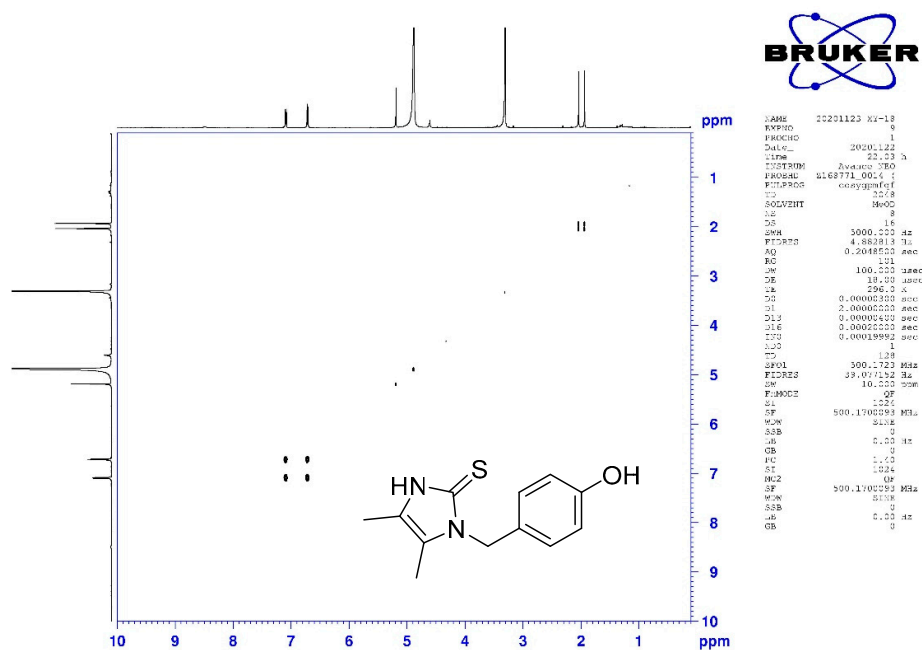

Figure S26. The <sup>1</sup>H-<sup>1</sup>H COSY spectrum of compound **2** in MeOH-*d*<sub>4</sub> (500 MHz).

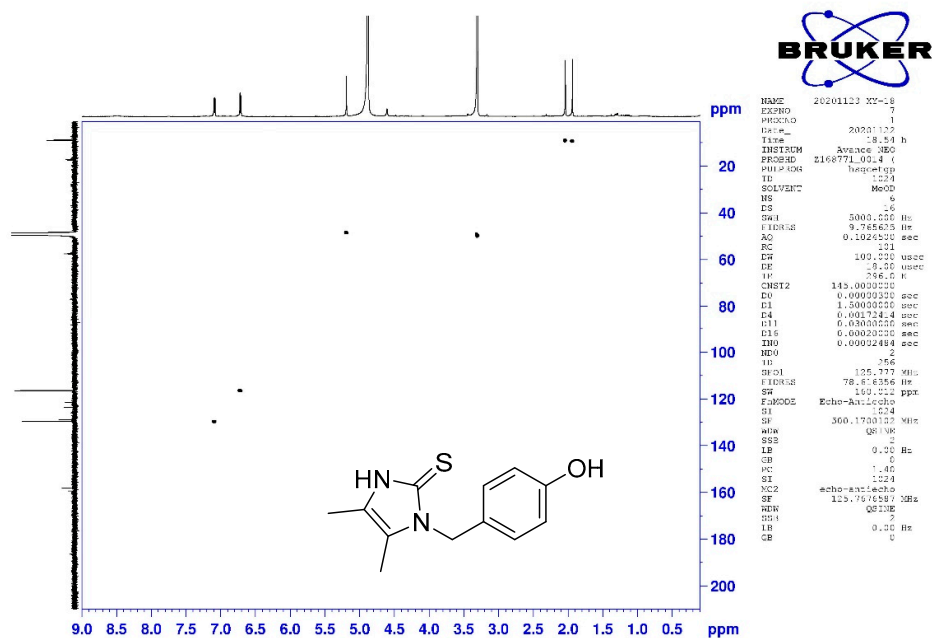

Figure S27. The HSQC spectrum of compound **2** in MeOH-*d*<sub>4</sub> (500 MHz for <sup>1</sup>H).

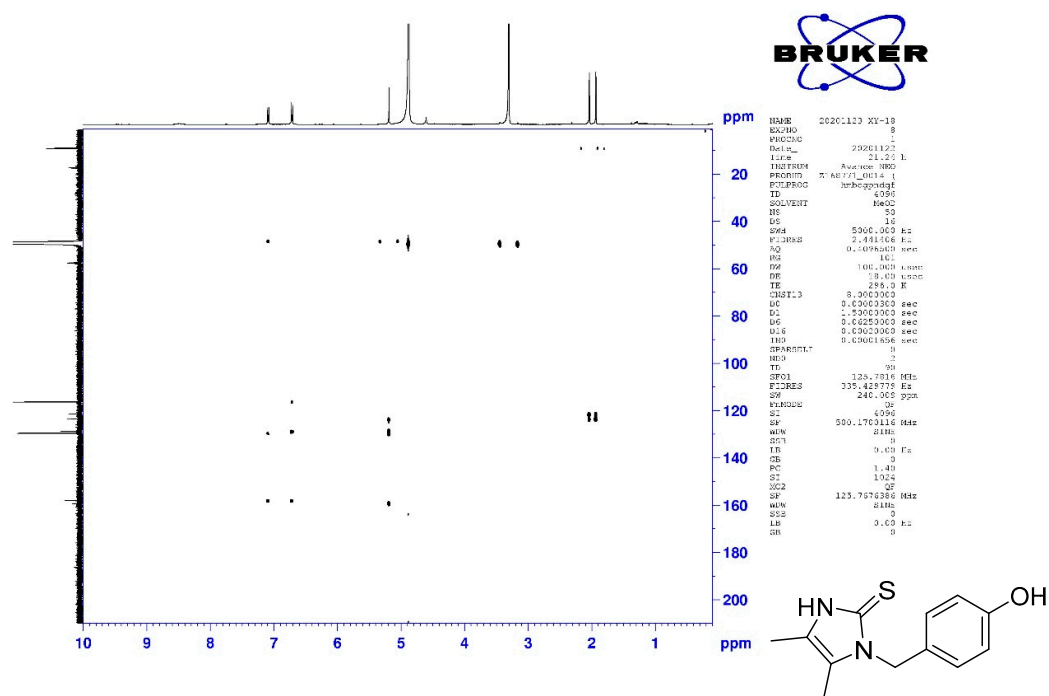

Figure S28. The HMBC spectrum of compound **2** in MeOH-*d*<sub>4</sub> (500 MHz for <sup>1</sup>H).

**Table S1.** Geometry data of conformers of isomer **1a** and isomer **1b**.

**1a-c2** ,  $\Delta G = 0.0000$  kcal/mol, population = 21.81 %

N -1.562738 1.393339 -0.024114  
C -1.881717 -0.000459 -0.285641  
C -0.612855 -0.442888 -1.034619  
N 0.206789 0.659427 -1.112470  
C -0.377431 1.777798 -0.514903  
O -2.016498 -0.747598 0.903472  
C -3.416463 -1.089686 1.137137  
C -4.193588 -0.290982 0.083633  
C -3.188700 -0.201082 -1.054247  
C 1.547383 0.612104 -1.700638  
C 2.561277 -0.019893 -0.780158  
C 3.156502 -1.237389 -1.105952  
C 4.091099 -1.827700 -0.265239  
C 4.438431 -1.199513 0.927978  
C 3.849613 0.017710 1.270925  
C 2.921483 0.598888 0.417631  
S 0.288885 3.308855 -0.448185  
O -0.379737 -1.547086 -1.467611  
C -3.601535 -2.591293 1.043534  
O -4.448668 1.052938 0.511585  
O 5.361344 -1.820164 1.724742  
H -2.234895 2.033134 0.371372  
H -3.661176 -0.736790 2.140502  
H -5.121121 -0.787769 -0.205518  
H -3.140226 -1.142927 -1.599169  
H -3.401196 0.608148 -1.747689  
H 1.471234 0.047667 -2.628302  
H 1.809126 1.641256 -1.938475  
H 2.883731 -1.736037 -2.027895  
H 4.551925 -2.772772 -0.521377  
H 4.119827 0.509105 2.198460  
H 2.472881 1.546867 0.687404  
H -2.920848 -3.094272 1.730551  
H -3.400534 -2.954265 0.034209  
H -4.624254 -2.860246 1.313954  
H -5.036197 1.029967 1.276555  
H 5.520782 -1.293044 2.517850

**1a-c10** ,  $\Delta G = 0.0489$  kcal/mol, population = 20.08 %

N -1.595382 1.296291 -0.352961  
C -1.981071 -0.015906 0.136261

C -0.770561 -0.351721 1.024010  
N 0.094198 0.714196 0.936508  
C -0.401299 1.709816 0.092654  
O -3.152579 0.030066 0.921093  
C -4.272293 -0.574089 0.205248  
C -3.745894 -0.807211 -1.215810  
C -2.261726 -1.031781 -0.973185  
C 1.390852 0.751404 1.623632  
C 2.486422 0.082986 0.832177  
C 2.679641 -1.298369 0.908682  
C 3.673203 -1.924413 0.170158  
C 4.497520 -1.167236 -0.660918  
C 4.320887 0.212525 -0.745879  
C 3.320510 0.826294 -0.001461  
S 0.365871 3.146886 -0.276805  
O -0.617229 -1.357622 1.677764  
C -4.718331 -1.833921 0.920824  
O -3.854698 0.369336 -2.027287  
O 5.463734 -1.831426 -1.365255  
H -2.133867 1.792449 -1.046413  
H -5.075082 0.165329 0.198261  
H -4.231561 -1.656723 -1.698574  
H -2.083552 -2.035664 -0.589859  
H -1.654776 -0.869101 -1.859690  
H 1.619784 1.798441 1.803568  
H 1.243621 0.254143 2.580762  
H 2.041125 -1.890541 1.551677  
H 3.823069 -2.994406 0.232761  
H 4.963093 0.804202 -1.388068  
H 3.181833 1.896884 -0.076451  
H -5.611130 -2.241120 0.442890  
H -4.957998 -1.606925 1.959743  
H -3.936469 -2.595100 0.907909  
H -4.788825 0.574967 -2.153693  
H 5.972679 -1.207115 -1.897674

**1a-c5**,  $\Delta G = 0.0998$  kcal/mol, population = 18.43 %

N -1.570422 1.403864 -0.037794  
C -1.891367 0.009821 -0.294642  
C -0.616599 -0.440867 -1.028534  
N 0.211069 0.656030 -1.096622  
C -0.374961 1.779531 -0.510347  
O -2.037732 -0.730502 0.897734  
C -3.440747 -1.065201 1.123317

C -4.206980 -0.271414 0.058028  
C -3.192507 -0.191945 -1.072249  
C 1.561423 0.597765 -1.661284  
C 2.550538 -0.048636 -0.724197  
C 3.134102 -1.271874 -1.040878  
C 4.043432 -1.877700 -0.180415  
C 4.372523 -1.257637 1.022120  
C 3.795786 -0.031666 1.354386  
C 2.895600 0.563185 0.483981  
S 0.300511 3.306152 -0.436122  
O -0.385073 -1.546982 -1.457506  
C -3.631006 -2.566710 1.039517  
O -4.462045 1.076127 0.474518  
O 5.254075 -1.802695 1.915032  
H -2.242909 2.047532 0.350716  
H -3.691648 -0.703982 2.122195  
H -5.133387 -0.767749 -0.235429  
H -3.142297 -1.137589 -1.610434  
H -3.397125 0.613203 -1.772773  
H 1.496838 0.038247 -2.592826  
H 1.837796 1.625290 -1.889381  
H 2.874127 -1.765705 -1.969009  
H 4.489899 -2.830484 -0.440537  
H 4.062054 0.442666 2.290007  
H 2.454237 1.517008 0.745234  
H -4.656557 -2.829812 1.304963  
H -2.956987 -3.067165 1.734909  
H -3.424567 -2.937857 0.034270  
H -5.058365 1.060325 1.232828  
H 5.580571 -2.647763 1.580996

**1a** -c11 , delta G = 0.2102 kcal/mol, population = 15.29 %

N -1.603791 1.263402 0.348397  
C -1.953486 -0.004581 -0.269689  
C -0.686964 -0.270814 -1.101220  
N 0.153578 0.798917 -0.898252  
C -0.411361 1.739708 -0.035544  
O -2.126553 -1.031675 0.681179  
C -3.537716 -1.384810 0.802880  
C -4.277934 -0.318899 -0.014240  
C -3.252120 0.037996 -1.077956  
C 1.499735 0.877785 -1.477446  
C 2.525333 0.128660 -0.665340  
C 3.204531 0.754526 0.382344

C 4.134449 0.063562 1.145514  
C 4.400089 -1.276098 0.866151  
C 3.732636 -1.915184 -0.177011  
C 2.803728 -1.210832 -0.933360  
S 0.276370 3.196664 0.406128  
O -0.474077 -1.236324 -1.797543  
C -3.754851 -2.805179 0.320121  
O -4.509806 0.873393 0.746715  
O 5.327498 -1.911473 1.645417  
H -2.268902 1.801228 0.883190  
H -3.791903 -1.298139 1.860774  
H -5.211449 -0.698474 -0.432925  
H -3.215749 -0.730300 -1.849185  
H -3.433821 1.005462 -1.538244  
H 1.427173 0.467457 -2.482984  
H 1.744967 1.934617 -1.545329  
H 2.997802 1.793525 0.604789  
H 4.662849 0.550696 1.954721  
H 3.939531 -2.955847 -0.398151  
H 2.284156 -1.713324 -1.739101  
H -3.540899 -2.899160 -0.745829  
H -4.788582 -3.107637 0.497076  
H -3.099789 -3.487126 0.862508  
H -5.106676 0.666067 1.475894  
H 5.430890 -2.826801 1.355797

**1a-c9**,  $\Delta G = 0.4512$  kcal/mol, population = 10.18 %

N -1.596117 1.385555 -0.178536  
C -1.897073 0.007552 0.173224  
C -0.634040 -0.361058 0.969815  
N 0.179517 0.748226 0.959881  
C -0.397118 1.802499 0.248972  
O -3.032418 -0.097138 1.003256  
C -4.158662 -0.656019 0.260950  
C -3.682398 -0.700853 -1.196036  
C -2.181464 -0.886597 -1.035265  
C 1.494346 0.773587 1.606217  
C 2.544785 0.044141 0.807266  
C 2.986673 0.547727 -0.419091  
C 3.945744 -0.122981 -1.162107  
C 4.484565 -1.316646 -0.681462  
C 4.057130 -1.830442 0.540343  
C 3.090311 -1.149119 1.272163  
S 0.296981 3.299756 -0.013636

O -0.407026 -1.417853 1.510979  
C -4.533078 -2.007574 0.835842  
O -3.871442 0.555323 -1.860365  
O 5.429088 -1.936081 -1.453042  
H -2.180161 1.919491 -0.804086  
H -4.985114 0.048371 0.369525  
H -4.153563 -1.509721 -1.756680  
H -1.947691 -1.918704 -0.777069  
H -1.618292 -0.597534 -1.918548  
H 1.747859 1.823756 1.734747  
H 1.378804 0.319541 2.588906  
H 2.574607 1.476528 -0.793566  
H 4.289251 0.268257 -2.110907  
H 4.473490 -2.757822 0.916784  
H 2.754342 -1.559805 2.216204  
H -4.727861 -1.917389 1.904578  
H -3.732010 -2.734593 0.692466  
H -5.436461 -2.383379 0.351888  
H -4.817390 0.735344 -1.921936  
H 5.731536 -2.743927 -1.019430

**1a-c1** , delta G = 0.6081 kcal/mol, population = 7.81 %

N -1.599778 1.402660 -0.141104  
C -1.898513 0.013153 0.164531  
C -0.651313 -0.369377 0.979354  
N 0.153971 0.745273 1.019549  
C -0.413854 1.815189 0.325311  
O -3.051700 -0.122796 0.964770  
C -4.156121 -0.669112 0.181489  
C -3.646667 -0.668830 -1.264872  
C -2.148333 -0.848093 -1.075132  
C 1.453064 0.761705 1.697190  
C 2.528122 0.062351 0.903918  
C 3.073155 -1.140684 1.349687  
C 4.062279 -1.793154 0.625560  
C 4.516649 -1.243076 -0.570383  
C 3.979057 -0.041712 -1.032898  
C 2.994874 0.602316 -0.295158  
S 0.275480 3.323717 0.120430  
O -0.428762 -1.439546 1.495432  
C -4.532028 -2.039417 0.709139  
O -3.830628 0.604414 -1.897474  
O 5.491058 -1.922018 -1.249363  
H -2.173423 1.950216 -0.764488



H -4.990742 0.025421 0.291112  
H -4.098555 -1.464784 -1.858874  
H -1.912193 -1.885437 -0.841254  
H -1.567637 -0.529657 -1.936704  
H 1.695281 1.809615 1.860936  
H 1.317980 0.279582 2.663883  
H 2.716617 -1.578807 2.273690  
H 4.484661 -2.726175 0.975131  
H 4.333074 0.388856 -1.962490  
H 2.584738 1.537428 -0.655741  
H -3.721705 -2.755711 0.563823  
H -5.420842 -2.408391 0.193972  
H -4.751978 -1.981266 1.775205  
H -4.776353 0.779649 -1.974464  
H 5.724266 -1.445338 -2.055936

**1a-c12** ,  $\Delta G = 1.6893$  kcal/mol, population = 1.26 %

N -1.389125 1.568540 -0.274120  
C -1.923117 0.244986 -0.048688  
C -0.783999 -0.374268 0.786798  
N 0.161469 0.609163 0.965986  
C -0.207403 1.791448 0.328015  
O -3.105373 0.274235 0.742011  
C -4.183951 -0.417485 0.066581  
C -3.473097 -1.371378 -0.890735  
C -2.256957 -0.546184 -1.317350  
C 1.418233 0.396845 1.694036  
C 2.527832 -0.104281 0.804765  
C 3.530068 0.755497 0.360696  
C 4.547711 0.301865 -0.470785  
C 4.568206 -1.032067 -0.871994  
C 3.574192 -1.906292 -0.433357  
C 2.567648 -1.441116 0.399411  
S 0.665456 3.212227 0.319063  
O -0.741673 -1.506114 1.211654  
C -5.079282 -1.068772 1.092102  
O -4.351673 -1.714804 -1.951463  
O 5.538755 -1.541077 -1.690274  
H -1.869199 2.289170 -0.789757  
H -4.747142 0.308169 -0.531051  
H -3.154660 -2.265150 -0.346785  
H -1.415779 -1.142021 -1.665077  
H -2.551803 0.142864 -2.110043  
H 1.683803 1.346344 2.151213

H 1.192303 -0.320846 2.480867  
H 3.513419 1.794936 0.661280  
H 5.322598 0.981971 -0.805347  
H 3.604584 -2.942138 -0.745335  
H 1.800164 -2.124910 0.739181  
H -5.879749 -1.609003 0.583869  
H -5.531730 -0.321614 1.744910  
H -4.510939 -1.772816 1.702194  
H -3.986673 -2.473120 -2.421613  
H 6.167389 -0.847767 -1.927793

**1a-c16**,  $\Delta G = 1.8179$  kcal/mol, population = 1.01 %

N -1.388031 1.546205 -0.334486  
C -1.920661 0.231283 -0.061150  
C -0.773941 -0.361672 0.782993  
N 0.170776 0.628205 0.926482  
C -0.203673 1.789785 0.254548  
O -3.094440 0.287901 0.741202  
C -4.180924 -0.424147 0.100572  
C -3.481355 -1.409527 -0.832889  
C -2.269424 -0.599949 -1.299551  
C 1.429879 0.441124 1.657203  
C 2.539675 -0.085015 0.782609  
C 2.585613 -1.432980 0.424498  
C 3.597127 -1.922240 -0.391930  
C 4.588554 -1.058902 -0.857221  
C 4.559202 0.288441 -0.504313  
C 3.539480 0.764588 0.308185  
S 0.666415 3.211006 0.197402  
O -0.726467 -1.480388 1.240929  
C -5.065312 -1.040708 1.156611  
O -4.371832 -1.786588 -1.872040  
O 5.613933 -1.480119 -1.658351  
H -1.873773 2.250903 -0.866580  
H -4.750103 0.282320 -0.514140  
H -3.157541 -2.285327 -0.263454  
H -1.432748 -1.207693 -1.637370  
H -2.572662 0.063544 -2.110666  
H 1.694378 1.404899 2.084201  
H 1.207262 -0.252194 2.466479  
H 1.821362 -2.109142 0.786070  
H 3.620983 -2.971976 -0.661423  
H 5.335695 0.948872 -0.867764  
H 3.516161 1.813623 0.572991

H -5.509772 -0.272202 1.789831  
H -4.490699 -1.725216 1.782860  
H -5.871878 -1.596218 0.675202  
H -4.012527 -2.560204 -2.321177  
H 5.532636 -2.427103 -1.827949

**1a-c15**, delta G = 1.9089 kcal/mol, population = 0.87 %

N -1.387946 1.537528 -0.260448  
C -1.924940 0.216488 -0.026257  
C -0.776858 -0.407241 0.794270  
N 0.169058 0.576172 0.970540  
C -0.204266 1.760252 0.338472  
O -3.093116 0.249312 0.785695  
C -4.192405 -0.405922 0.106118  
C -3.500473 -1.376921 -0.858616  
C -2.281994 -0.572074 -1.290140  
C 1.429015 0.363734 1.692701  
C 2.541717 -0.115245 0.795179  
C 3.552620 0.752016 0.387356  
C 4.575012 0.318998 -0.449374  
C 4.591100 -1.001402 -0.892980  
C 3.587974 -1.883031 -0.491304  
C 2.577079 -1.438659 0.347455  
S 0.666268 3.182081 0.331952  
O -0.730295 -1.540987 1.213116  
C -5.104832 -1.032776 1.131745  
O -4.286575 -1.720060 -1.990360  
O 5.565728 -1.490001 -1.718779  
H -1.875529 2.262539 -0.762779  
H -4.733462 0.337716 -0.489656  
H -3.191569 -2.274279 -0.314456  
H -1.454728 -1.182186 -1.644907  
H -2.572226 0.119383 -2.082794  
H 1.688327 1.308306 2.163551  
H 1.209665 -0.367098 2.469285  
H 3.539250 1.781582 0.720330  
H 5.356487 1.004851 -0.755683  
H 3.614808 -2.908451 -0.836286  
H 1.803244 -2.128767 0.658985  
H -4.563044 -1.770517 1.726088  
H -5.938658 -1.528420 0.630316  
H -5.517308 -0.276050 1.799779  
H -4.903587 -2.417372 -1.739610  
H 6.200028 -0.793106 -1.929198

**1a-c13** , delta G = 1.9421 kcal/mol, population = 0.82 %

N -1.459361 1.374538 0.869365  
C -1.946188 0.326518 0.001833  
C -0.764289 0.210583 -0.982422  
N 0.181690 1.126205 -0.582371  
C -0.241190 1.837964 0.537650  
O -2.092640 -0.909405 0.688444  
C -3.437073 -1.423095 0.528016  
C -3.934956 -0.766453 -0.757628  
C -3.287417 0.618044 -0.680322  
C 1.492465 1.264738 -1.229414  
C 2.522654 0.322530 -0.660675  
C 3.433033 0.755811 0.301475  
C 4.371180 -0.114943 0.843416  
C 4.404299 -1.443121 0.423159  
C 3.502800 -1.891061 -0.541587  
C 2.574294 -1.010498 -1.076201  
S 0.602768 3.058456 1.298859  
O -0.685863 -0.548346 -1.920966  
C -3.398143 -2.931732 0.518168  
O -5.354373 -0.751887 -0.759735  
O 5.300373 -2.350281 0.917784  
H -1.990393 1.768350 1.629945  
H -4.053594 -1.059958 1.358200  
H -3.552098 -1.318192 -1.620817  
H -3.162262 1.103493 -1.645880  
H -3.891361 1.260924 -0.038691  
H 1.329088 1.072266 -2.288330  
H 1.796977 2.300521 -1.104062  
H 3.405210 1.784110 0.637672  
H 5.075412 0.236640 1.588784  
H 3.542292 -2.923072 -0.865019  
H 1.876092 -1.362784 -1.824757  
H -2.767337 -3.292336 -0.296059  
H -4.408670 -3.319733 0.379445  
H -3.010453 -3.317062 1.461747  
H -5.659591 -0.536154 -1.648415  
H 5.865899 -1.929386 1.577444

**1a-c18** , delta G = 2.0350 kcal/mol, population = 0.70 %

N -1.460522 1.376139 0.822021  
C -1.941406 0.302164 -0.016999  
C -0.760880 0.170443 -1.001610

N 0.180645 1.100336 -0.624895  
 C -0.244738 1.837036 0.477977  
 O -2.073468 -0.918990 0.698366  
 C -3.425254 -1.426601 0.578909  
 C -3.934358 -0.810371 -0.730572  
 C -3.286984 0.567616 -0.700993  
 C 1.490496 1.229346 -1.275836  
 C 2.526845 0.310633 -0.680398  
 C 3.440075 0.779494 0.262107  
 C 4.383907 -0.069057 0.828881  
 C 4.419829 -1.410634 0.453972  
 C 3.515519 -1.894249 -0.490742  
 C 2.581453 -1.035592 -1.050665  
 S 0.594127 3.079309 1.208483  
 O -0.679824 -0.610424 -1.921539  
 C -3.393039 -2.934623 0.629975  
 O -5.347476 -0.683994 -0.794839  
 O 5.321340 -2.297377 0.975049  
 H -1.991730 1.784591 1.574720  
 H -4.027586 -1.024854 1.401488  
 H -3.558118 -1.391548 -1.577455  
 H -3.170549 1.019458 -1.683270  
 H -3.888738 1.232125 -0.079174  
 H 1.328230 1.005658 -2.328770  
 H 1.788252 2.270246 -1.180257  
 H 3.410066 1.818482 0.563408  
 H 5.090240 0.310104 1.558576  
 H 3.557286 -2.936513 -0.779107  
 H 1.881377 -1.415574 -1.783780  
 H -2.976565 -3.282669 1.575739  
 H -2.790532 -3.332636 -0.188373  
 H -4.407575 -3.329166 0.544308  
 H -5.723960 -1.529761 -1.064275  
 H 5.888740 -1.852168 1.616899

**1a-c14**,  $\Delta G = 2.0563$  kcal/mol, population = 0.68 %

N -1.461410 1.379693 0.879500  
 C -1.942805 0.333792 0.006277  
 C -0.753100 0.218035 -0.968657  
 N 0.188704 1.135073 -0.562365  
 C -0.242116 1.845484 0.555490  
 O -2.097790 -0.902773 0.689471  
 C -3.441739 -1.413762 0.516115  
 C -3.926938 -0.753675 -0.772571

C -3.277752 0.629520 -0.686696  
C 1.503848 1.272622 -1.201061  
C 2.522070 0.311118 -0.643227  
C 3.385582 0.699491 0.382608  
C 4.308685 -0.188637 0.915942  
C 4.378956 -1.490613 0.423932  
C 3.527227 -1.893650 -0.603598  
C 2.608932 -0.993471 -1.129327  
S 0.594701 3.066889 1.323337  
O -0.666611 -0.540741 -1.906602  
C -3.405315 -2.922416 0.503107  
O -5.346227 -0.736566 -0.787930  
O 5.304518 -2.327616 0.983668  
H -1.998202 1.773269 1.636134  
H -4.064891 -1.051322 1.341603  
H -3.537094 -1.304305 -1.633372  
H -3.143358 1.116825 -1.650071  
H -3.886040 1.272210 -0.048878  
H 1.345159 1.099484 -2.263904  
H 1.815940 2.303661 -1.056276  
H 3.328267 1.707305 0.772899  
H 4.978762 0.114719 1.709818  
H 3.585554 -2.903684 -0.992794  
H 1.947900 -1.312207 -1.925114  
H -2.767962 -3.282154 -0.306407  
H -4.415208 -3.308401 0.354431  
H -3.026693 -3.310713 1.449148  
H -5.642497 -0.516591 -1.678627  
H 5.256238 -3.197966 0.568631

**1a-c19**,  $\Delta G = 2.1593$  kcal/mol, population = 0.57 %

N -1.386186 1.518993 -0.308418  
C -1.921887 0.204420 -0.037887  
C -0.768095 -0.399440 0.789451  
N 0.177125 0.588998 0.938559  
C -0.200535 1.757535 0.280576  
O -3.083615 0.258221 0.782510  
C -4.189384 -0.409888 0.126560  
C -3.506407 -1.406231 -0.818455  
C -2.289730 -0.614742 -1.278923  
C 1.439232 0.395300 1.662124  
C 2.550891 -0.105010 0.774863  
C 3.557985 0.755612 0.337634  
C 4.580402 0.303692 -0.485332

C 4.604758 -1.030005 -0.886811  
C 3.606069 -1.904281 -0.458847  
C 2.592096 -1.439463 0.368657  
S 0.667732 3.180013 0.237378  
O -0.717482 -1.523430 1.233484  
C -5.096743 -1.008392 1.173370  
O -4.301180 -1.776412 -1.935487  
O 5.632516 -1.427572 -1.696919  
H -1.877918 2.232095 -0.823589  
H -4.732228 0.320537 -0.483789  
H -3.195069 -2.290117 -0.253953  
H -1.466199 -1.235136 -1.624410  
H -2.584624 0.057211 -2.086492  
H 1.698889 1.351474 2.108790  
H 1.222457 -0.316099 2.457210  
H 3.538308 1.794643 0.639562  
H 5.362300 0.972769 -0.820238  
H 3.626381 -2.943751 -0.765798  
H 1.822693 -2.124583 0.701380  
H -5.501885 -0.234145 1.825635  
H -4.553363 -1.733408 1.781765  
H -5.935825 -1.512997 0.689974  
H -4.918719 -2.464790 -1.662320  
H 5.545680 -2.366740 -1.903215

**1a-c20** ,  $\Delta G = 2.2283$  kcal/mol, population = 0.51 %

N -1.448304 1.513381 0.564351  
C -1.934393 0.297315 -0.047084  
C -0.758721 -0.025893 -0.992510  
N 0.182821 0.961067 -0.812974  
C -0.236542 1.899526 0.127013  
O -2.065624 -0.760585 0.892798  
C -3.419809 -1.275674 0.882185  
C -3.934339 -0.925943 -0.520096  
C -3.282683 0.428453 -0.764521  
C 1.488424 0.957993 -1.485285  
C 2.522663 0.155362 -0.737844  
C 2.604042 -1.227596 -0.901708  
C 3.536855 -1.978236 -0.197243  
C 4.409168 -1.343634 0.686039  
C 4.344945 0.038097 0.855382  
C 3.406975 0.775235 0.146648  
S 0.603587 3.262454 0.593413  
O -0.681108 -0.972765 -1.740841

C -3.392654 -2.744636 1.227252  
O -5.347337 -0.808879 -0.601087  
O 5.349618 -2.024933 1.408507  
H -1.976095 2.062440 1.224301  
H -4.015993 -0.717867 1.613092  
H -3.564446 -1.663374 -1.238413  
H -3.169468 0.677945 -1.816906  
H -3.879495 1.204703 -0.283188  
H 1.317394 0.546290 -2.478287  
H 1.792928 1.996703 -1.583872  
H 1.927488 -1.725500 -1.584519  
H 3.590591 -3.051921 -0.336332  
H 5.030957 0.520633 1.539348  
H 3.354371 1.846991 0.287396  
H -2.972599 -2.902967 2.220999  
H -2.795930 -3.297784 0.499864  
H -4.409053 -3.143693 1.224732  
H -5.728053 -1.689593 -0.696293  
H 5.294492 -2.969152 1.214860

**1b-c5** ,  $\Delta G = 0.0000$  kcal/mol, population = 31.84 %

N -1.501573 1.513260 0.676728  
C -2.003601 0.241106 0.214456  
C -0.868459 -0.167046 -0.744167  
N 0.036762 0.856091 -0.764785  
C -0.347482 1.888932 0.097281  
O -3.202178 0.383148 -0.530488  
C -4.204983 -0.580451 -0.087955  
C -3.414384 -1.635944 0.698510  
C -2.288406 -0.797759 1.306678  
C 1.280286 0.818604 -1.548056  
C 2.387285 0.085715 -0.834531  
C 2.539233 -1.292486 -0.984140  
C 3.540955 -1.979671 -0.309787  
C 4.411787 -1.284710 0.527825  
C 4.275973 0.093839 0.683754  
C 3.270627 0.767243 0.005248  
S 0.483147 3.309380 0.348695  
O -0.812803 -1.204920 -1.375347  
C -5.284527 0.120640 0.715171  
O -2.938006 -2.694432 -0.124872  
O 5.419030 -1.901374 1.216824  
H -1.996430 2.111401 1.319679  
H -4.622308 -1.025757 -0.990614



H -4.032467 -2.101775 1.463552  
H -2.631172 -0.282046 2.203077  
H -1.413382 -1.390349 1.564240  
H 1.034091 0.332671 -2.490199  
H 1.552308 1.852017 -1.745896  
H 1.863723 -1.838054 -1.630547  
H 3.647977 -3.050742 -0.436510  
H 4.962016 0.623974 1.331457  
H 3.165449 1.836861 0.132556  
H -5.709618 0.940590 0.135939  
H -4.888129 0.527722 1.647340  
H -6.085004 -0.581084 0.956779  
H -2.248764 -2.343058 -0.716640  
H 5.417256 -2.848258 1.027693

**1b-c1** ,  $\Delta G = 0.1525$  kcal/mol, population = 24.61 %

N -1.494548 1.553039 0.619806  
C -2.007367 0.263123 0.223401  
C -0.889992 -0.190794 -0.735578  
N 0.016038 0.828608 -0.818855  
C -0.351340 1.900152 0.002230  
O -3.218256 0.376037 -0.506559  
C -4.215140 -0.565254 -0.006297  
C -3.414026 -1.586136 0.814532  
C -2.276165 -0.724874 1.365534  
C 1.244634 0.754403 -1.622746  
C 2.368146 0.062804 -0.893968  
C 3.269397 0.790480 -0.117776  
C 4.291843 0.155082 0.575855  
C 4.423963 -1.230251 0.496711  
C 3.533834 -1.971310 -0.278873  
C 2.517596 -1.323924 -0.966527  
S 0.484806 3.329331 0.173243  
O -0.846971 -1.256351 -1.319749  
C -5.281699 0.172959 0.780741  
O -2.953911 -2.682757 0.032850  
O 5.409052 -1.913797 1.153953  
H -1.977726 2.181319 1.242587  
H -4.646676 -1.049768 -0.881688  
H -4.020631 -2.014686 1.609949  
H -2.602702 -0.168363 2.243406  
H -1.398307 -1.307949 1.634866  
H 0.982108 0.219807 -2.533619  
H 1.509021 1.776943 -1.878818

H 3.167653 1.865720 -0.049230  
H 4.987000 0.733240 1.173574  
H 3.649775 -3.045645 -0.338208  
H 1.826956 -1.904248 -1.565002  
H -6.079460 -0.515784 1.064912  
H -5.714184 0.967220 0.171946  
H -4.871184 0.620254 1.688036  
H -2.274028 -2.361038 -0.585942  
H 5.963545 -1.297911 1.649508

**1b-c2** ,  $\Delta G = 0.1845$  kcal/mol, population = 23.31 %

N -1.567580 1.668398 -0.106005  
C -2.038359 0.318034 0.086751  
C -0.873946 -0.260937 0.914199  
N 0.062708 0.724973 1.046512  
C -0.356874 1.907652 0.428186  
O -2.122310 -0.391138 -1.139026  
C -3.393943 -1.100111 -1.242803  
C -3.943837 -1.132540 0.190419  
C -3.407012 0.179930 0.765424  
C 1.367017 0.521283 1.693421  
C 2.393154 -0.050130 0.748783  
C 3.241710 0.786525 0.025282  
C 4.169321 0.265123 -0.868206  
C 4.256484 -1.114379 -1.047289  
C 3.418594 -1.964457 -0.327236  
C 2.497840 -1.430441 0.562332  
S 0.485024 3.343323 0.397333  
O -0.807084 -1.395286 1.347309  
C -4.295100 -0.407666 -2.247703  
O -3.512477 -2.276100 0.919053  
O 5.147015 -1.689467 -1.910903  
H -2.082664 2.378006 -0.603105  
H -3.156400 -2.111833 -1.570420  
H -5.031646 -1.162294 0.195096  
H -4.035701 1.018550 0.467540  
H -3.341142 0.168208 1.851057  
H 1.676929 1.489721 2.077277  
H 1.190377 -0.149678 2.531927  
H 3.172263 1.858564 0.155731  
H 4.824705 0.926948 -1.422563  
H 3.499688 -3.034179 -0.469584  
H 1.846712 -2.094305 1.116660  
H -5.203934 -0.992826 -2.400040

H -3.783568 -0.312335 -3.205762  
H -4.578196 0.590677 -1.909017  
H -2.553975 -2.201090 1.075967  
H 5.668044 -1.006132 -2.351241

**1b-c6** ,  $\Delta G = 0.2679$  kcal/mol, population = 20.24 %

N -1.573284 1.626617 -0.365574  
C -2.039538 0.325405 0.049094  
C -0.860904 -0.115402 0.939080  
N 0.076011 0.878125 0.897540  
C -0.355116 1.947390 0.105136  
O -2.144011 -0.571376 -1.045085  
C -3.418038 -1.283023 -1.013293  
C -3.942751 -1.084818 0.415958  
C -3.396300 0.301204 0.764416  
C 1.389700 0.779249 1.549826  
C 2.401632 0.057348 0.697361  
C 2.512233 -1.331973 0.749527  
C 3.422958 -2.008015 -0.052823  
C 4.242901 -1.290701 -0.922419  
C 4.147426 0.098601 -0.982499  
C 3.232705 0.760794 -0.176573  
S 0.483369 3.359333 -0.166964  
O -0.785314 -1.166118 1.546598  
C -4.335810 -0.755960 -2.100180  
O -3.497989 -2.098421 1.310255  
O 5.160900 -1.895968 -1.735118  
H -2.097905 2.248904 -0.960116  
H -3.187118 -2.334831 -1.179727  
H -5.030296 -1.110898 0.444339  
H -4.030141 1.083075 0.347068  
H -3.311676 0.463050 1.836669  
H 1.705735 1.796718 1.764791  
H 1.225428 0.255676 2.489693  
H 1.875721 -1.894270 1.420756  
H 3.499378 -3.087909 -0.000826  
H 4.792970 0.645381 -1.657409  
H 3.157222 1.839054 -0.230265  
H -5.248131 -1.353927 -2.141402  
H -3.841168 -0.817046 -3.069823  
H -4.611270 0.284882 -1.920544  
H -2.536993 -2.001377 1.436874  
H 5.138234 -2.852284 -1.603845
